# Supplementary material
Source: publisher figshare collection journal article supplement (https://frontiersin.figshare.com/ndownloader/files/14634719)
Supplement: Supplementary file [file 14634719]

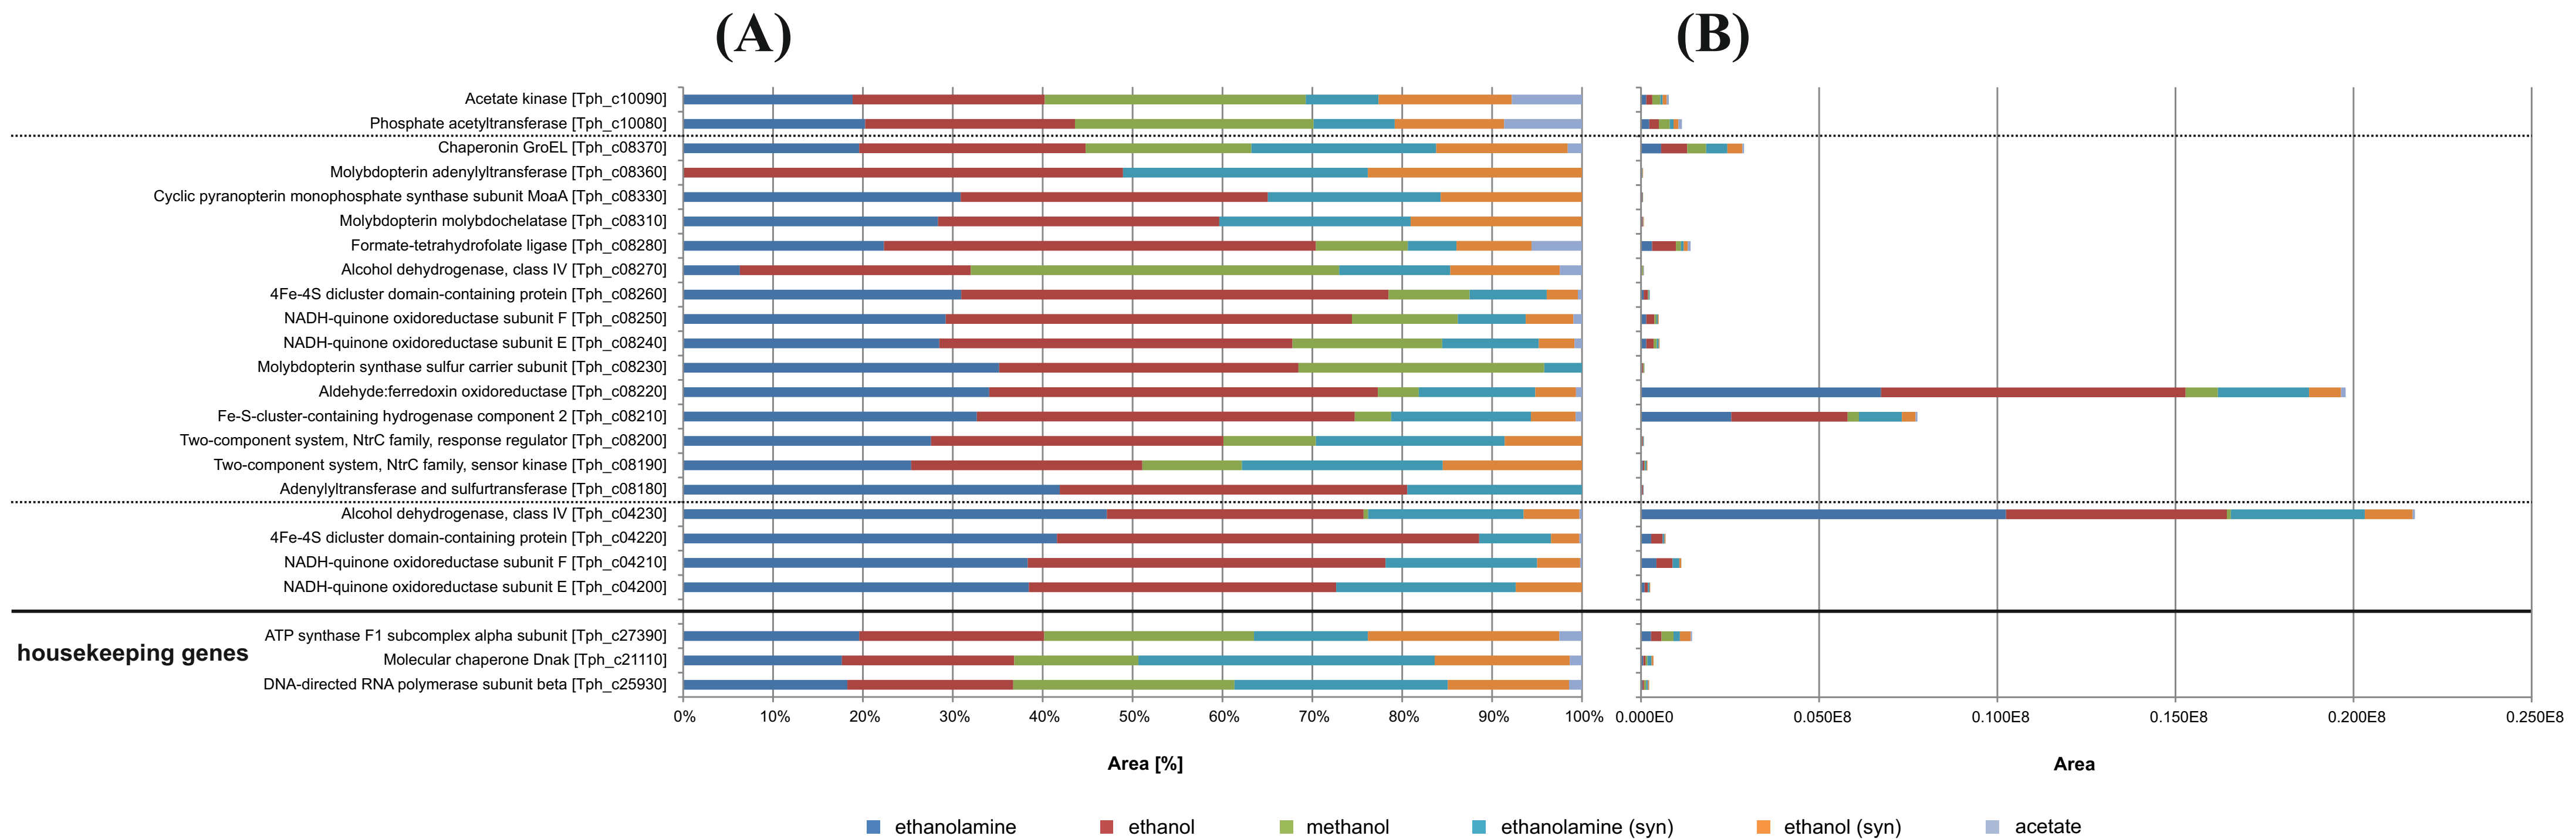

Supplementary Figure 4: Proteome data of the acetate kinase, phosphotransacetylase, all alcohol dehydrogenases and aldehyde:ferredoxin oxidoreductases obtained during growth of *Thermacetogenium phaeum* with different substrates. As the homologues of the aldehyde:ferredoxin oxidoreductases and the Fe-S – containing hydrogenase component cannot be distinguished by mass spectrometry the data is shown under Tph\_c08220 and Tph\_c08210. All expressed genes of the different gene clusters are shown in the graph. The clusters were separated by dashed lines. Housekeeping genes were depicted beneath the solid line. **(A)**: normalized data: percentage of protein abundances (expressed as area of mass spectroscopy signals) under various growth conditions relative to the summed protein abundances (area) of all growth conditions. **(B)**: absolute sums of area values of the respective identified proteins obtained in all growth conditions are shown here.
